# Supplementary figures and images for: Synergistic functionalization of poly(p-terphenyl isatin) anion exchange membrane with quaternary ammonium and piperidine cations for fuel cells
Source: Royal Society of Chemistry journal article supplement (doi:10.1039/d3im00077j), 2023-09-14

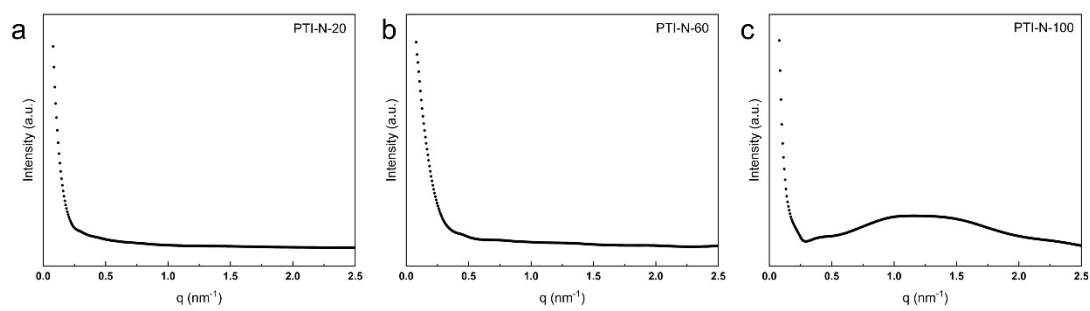

**Fig. S1** SAXS profiles of (a) PTI-N-20, (b) PTI-N-60 and (c) PTI-N-100.

Supplement: d3im00077j1.pdf [file d3im00077j1.pdf]
